# Supplementary material for: Citrus Peel Extract Ameliorates High-Fat Diet-Induced NAFLD via Activation of AMPK Signaling
Source: PubMed Central journal article supplement (PMC7146518; doi:10.3390/nu12030673), 2020-03-01
Supplement: nutrients-12-00673-s001.pdf [file nutrients-12-00673-s001.pdf]

## Supplementary information

**Table S1.** Sequences for Primers Used in Real-time RT-PCR.

| Genes        | Rat                                   | Mouse                                  |
|--------------|---------------------------------------|----------------------------------------|
| <b>SCD-1</b> | Forward-5'-atcccctcctccaaggtcta-3'    | Forward-5'-gaggcctgtacgggatcata-3'     |
|              | Reverse-5'-cgggccattcatatacatc-3'     | Forward-5'-tgagagaagaagaagccacgg-3'    |
| <b>HMG-R</b> | Forward-5'-agaatatagcgcgtgggatg-3'    | Forward-5'-aatgccttgattggagttg-3'      |
|              | Reverse-5'-gacatacagccaaagcagca-3'    | Forward-5'-cagaccaaggaaaccttagc-3'     |
| <b>GPAT</b>  | Forward-5'-cagcgtgattgctacctgaa-3'    | Forward-5'-caacaccatccccgacatc-3'      |
|              | Reverse-5'-ctctccgtcctggtgagaag-3'    | Reverse-5'-ccgcagcattctgataacgc-3'     |
| <b>ACC</b>   | Forward-5'-gtttggcctttcacatgaggtcc-3' | Forward-5'-acagtggagctagaattggac -3'   |
|              | Reverse-5'-gtggggatacctgcagtttga-3'   | Reverse-5'-actttccgaccaaggactttg-3'    |
| <b>GAPDH</b> | Forward-5'-cctggagaacctgccaagtat-3'   | Forward-5'-aatggtgaaggtcggtgtg -3'     |
|              | Reverse-5'-ctcggccgcctgctt-3'         | Reverse-5'-gtggagtcatactggaacatgtag-3' |

SCD: Stearoyl-CoA desaturase -1 ,HMG-R: 3-hydroxy-3-methylglutaryl CoA reductase, GPAT: Glycerol 3-phosphate acyltransferase ,ACC: acetyl-coenzyme A carboxylase .

**A**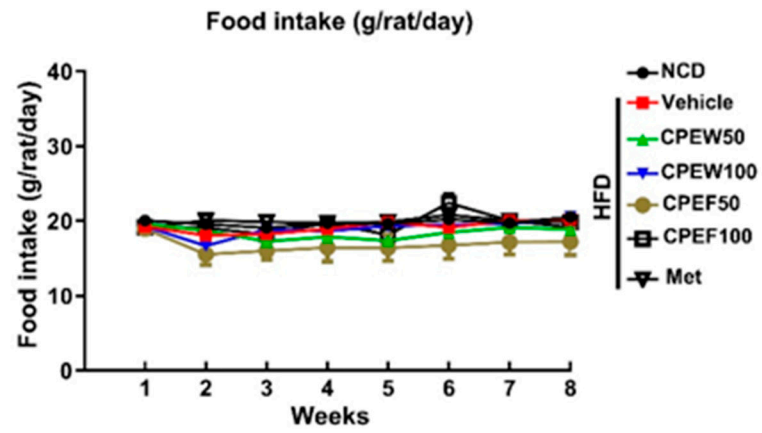**B**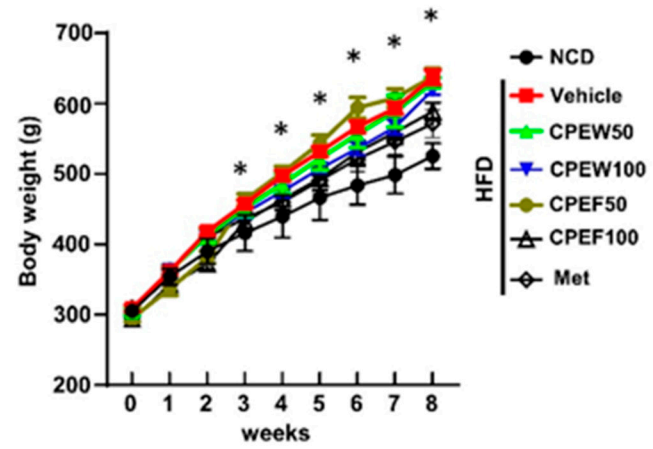

Figure S1. The effects of Citrus peel extract on body weight and food intake in high fat diet-induced hepatic steatosis in rat.
